# Supplementary material for: LKB1 coordinates neurite remodeling to drive synapse layer emergence in the outer retina
Source: eLife. 2020 May 7;9:e56931. doi: 10.7554/eLife.56931 (PMC7237215; doi:10.7554/eLife.56931)
Supplement: Source code 1. [file elife-56931-code1.r]

#input directory 
filesList <- list.files("/Users/casasent/Documents/Projects/CB/Data/OPL Quantifications/P5 CX57 DAPI CALB OPN1 Slices_Output/", pattern = "csv", full.names = TRUE)
#output directory
outputDir <- "/Users/casasent/Documents/Projects/CB/Data/OPL Quantifications/Graphs/"
#Names
setName <- "P5 CX57"

AreaData <- NULL
for(filesNames in filesList)
{
 temp <- read.csv(filesNames)  
 if(!is.null(AreaData))
 {
   AreaData <- rbind(AreaData, temp)
 }
 if(is.null(AreaData))
 {
   AreaData <- temp
 }
}
AreaData$Type <- substring(AreaData$Slice, 22,23)
AreaData$Mouse <- substring(AreaData$Slice, 14,20)
AreaData$Image <- substring(AreaData$Slice, 46,48)
AreaData_Results <- data.frame(Name=paste(AreaData$Mouse,AreaData$Image),
                               Value=AreaData$Total.Area, 
                               Type= AreaData$Type, 
                               Mut_Type= AreaData$Type)

source("/Users/casasent/Documents/Scripts/basicFunctions.R")
AreaData_Summary_By_Image <- getAverageBySample(AreaData_Results)
AreaData_Summary_By_Image$Name <- substring(AreaData_Summary_By_Image$Name, 1, 8)
AreaData_Summary <- getAverageBySample(AreaData_Summary_By_Image)
AreaData_Summary$Value <- AreaData_Summary$Value*(0.2)^2 # convert to microns squared

pdf(paste(outputDir, "/", setName, "OPL_Area_boxplot.pdf", sep=""))
title1 <- paste(setName, "OPL Area\n")
WTmax <- AreaData_Summary$Value[AreaData_Summary$Type=="WT"]
MTmax <- AreaData_Summary$Value[AreaData_Summary$Type=="MT"]
wcResult <- wilcox.test(x=WTmax,y=MTmax, exact = TRUE)
#ttResult <- t.test(x=WTmax,y=MTmax, alternative="greater", exact = TRUE)
ftResult <- var.test(x=WTmax,y=MTmax)
boxplot(list(WT=WTmax,MT=MTmax),
        main=title1, ylab="OPL Area",
        col = c("grey", "red"))
mtext(side=3, text=paste(" Wilcox P-value:",round(wcResult$p.value,9) , "\n F-test P-value:", round(ftResult$p.value,3)))
dev.off()

write.table(AreaData_Summary, file = paste(outputDir, "", setName, "_Area_Summary.txt", sep=""), quote = FALSE, sep = "\t",
            row.names = FALSE,
            col.names = TRUE)


#########
#input directory 
filesList <- list.files("/Users/casasent/Documents/Projects/CB/Data/OPL Quantifications/P5 DAPI OPN1 VGLUT1 Output Slices/", pattern = "csv", full.names = TRUE)
#filesList <- list.files("/Users/casasent/Documents/Projects/CB/Data/OPL Quantifications/P5 CX57 DAPI CALB OPN1 Slices_Output/", pattern = "csv", full.names = TRUE)
#output directory
outputDir <- "/Users/casasent/Documents/Projects/CB/Data/OPL Quantifications/Graphs/"

#Names
setName <- "P5"

AreaData <- NULL
for(filesNames in filesList)
{
  temp <- read.csv(filesNames)  
  if(!is.null(AreaData))
  {
    AreaData <- rbind(AreaData, temp)
  }
  if(is.null(AreaData))
  {
    AreaData <- temp
  }
}
AreaData$Type <- substring(AreaData$Slice, 15,16)
AreaData$Mouse <- substring(AreaData$Slice, 17,25)
AreaData$Image <- substring(AreaData$Slice, 47,51)
AreaData_Results <- data.frame(Name=paste(AreaData$Mouse,AreaData$Image),
                               Value=AreaData$Total.Area, 
                               Type= AreaData$Type, 
                               Mut_Type= AreaData$Type)

source("Documents/Scripts/basicFunctions.R")
AreaData_Summary_By_Image <- getAverageBySample(AreaData_Results)
AreaData_Summary_By_Image$Name <- substring(AreaData_Summary_By_Image$Name, 1, 9)
AreaData_Summary <- getAverageBySample(AreaData_Summary_By_Image)
AreaData_Summary$Value <- AreaData_Summary$Value*(0.2)^2 # convert to microns squared

pdf(paste(outputDir, "/", setName, "OPL_Area_boxplot.pdf", sep=""))
title1 <- paste(setName, "OPL Area\n")
WTmax <- AreaData_Summary$Value[AreaData_Summary$Type=="WT"]
MTmax <- AreaData_Summary$Value[AreaData_Summary$Type=="MT"]
wcResult <- wilcox.test(x=WTmax,y=MTmax, exact = TRUE)
#ttResult <- t.test(x=WTmax,y=MTmax, alternative="greater", exact = TRUE)
ftResult <- var.test(x=WTmax,y=MTmax)
boxplot(list(WT=WTmax,MT=MTmax),
        main=title1, ylab="OPL Area",
        col = c("grey", "red"))
mtext(side=3, text=paste(" Wilcox P-value:",round(wcResult$p.value,9) , "\n F-test P-value:", round(ftResult$p.value,3)))
dev.off()

write.table(AreaData_Summary, file = paste(outputDir, "/", setName, "_Area_Summary.txt", sep=""), quote = FALSE, sep = "\t",
            row.names = FALSE,
            col.names = TRUE)

#########
#input directory 
filesList <- c(list.files("/Users/casasent/Documents/Projects/CB/Data/OPL Quantifications/P8 DAPI CHX10 RDPS Output Slice/", pattern = "csv", full.names = TRUE), 
               list.files("/Users/casasent/Documents/Projects/CB/Data/OPL Quantifications/P8 DAPI OPN1 MCAR Output Slice/", pattern = "csv", full.names = TRUE),
               list.files("/Users/casasent/Documents/Projects/CB/Data/OPL Quantifications/P8 DAPI OPN1 VGLUT1 Slices_Output/", pattern = "csv", full.names = TRUE))

#output directory
outputDir <- "Desktop/OPL/Graphs/"
#Names
setName <- "P8"

AreaData <- NULL
for(filesNames in filesList)
{
  temp <- read.csv(filesNames)  
  if(!is.null(AreaData))
  {
    AreaData <- rbind(AreaData, temp)
  }
  if(is.null(AreaData))
  {
    AreaData <- temp
  }
}
AreaData$Type <- substring(AreaData$Slice, 15,16)
AreaData$Mouse <- substring(AreaData$Slice, 18,26)
AreaData$Image <- substring(AreaData$Slice, 47,51)
                           
AreaData_Results <- data.frame(Name=paste(AreaData$Mouse,AreaData$Image),
                               Value=AreaData$Total.Area, 
                               Type= AreaData$Type, 
                               Mut_Type= AreaData$Type)

  source("/Users/casasent/Documents/Scripts/basicFunctions.R")
AreaData_Summary_By_Image <- getAverageBySample(AreaData_Results)
AreaData_Summary_By_Image$Name <- substring(AreaData_Summary_By_Image$Name, 1, 9)
AreaData_Summary <- getAverageBySample(AreaData_Summary_By_Image)
AreaData_Summary$Value <- AreaData_Summary$Value*(0.2)^2 # convert to microns squared

pdf(paste(outputDir, "/", setName, "OPL_Area_boxplot.pdf", sep=""))
title1 <- paste(setName, "OPL Area\n")
WTmax <- AreaData_Summary$Value[AreaData_Summary$Type=="WT"]
MTmax <- AreaData_Summary$Value[AreaData_Summary$Type=="MT"]
wcResult <- wilcox.test(x=WTmax,y=MTmax, exact = TRUE)
#ttResult <- t.test(x=WTmax,y=MTmax, alternative="greater", exact = TRUE)
ftResult <- var.test(x=WTmax,y=MTmax)
boxplot(list(WT=WTmax,MT=MTmax),
        main=title1, ylab="OPL Area",
        col = c("grey", "red"))
mtext(side=3, text=paste(" Wilcox P-value:",round(wcResult$p.value,9) , "\n F-test P-value:", round(ftResult$p.value,3)))
dev.off()

write.table(AreaData_Summary, file = paste("/Users/casasent/", outputDir, "/", setName, "_Area_Summary.txt", sep=""), quote = FALSE, sep = "\t",
            row.names = FALSE,
            col.names = TRUE)
